# Supplementary material
Source: MDPI journal article supplement (https://www.mdpi.com/2077-0472/5/3/668)
Supplement: s1 [file s1]

Supplementary

**Table S1.** Elemental composition of the roots from wheat (*Triticum aestivum* L.) grown in Freeman or Bernhill soils that were either not amended or were amended with increasing rates of biochars. Biochar was produced either from gasification of Kentucky bluegrass seed screenings (KB) or from the gasification of chipped tree top wood (W) from mixed conifers.

| **Soil Series** | **Amendment Type/Rate** | **Combustible C** | | **Combustible N** | | **Cd** | | **Cu** | | **Fe** | | **Mn** | | **S** | | **Zn** | |
| --- | --- | --- | --- | --- | --- | --- | --- | --- | --- | --- | --- | --- | --- | --- | --- | --- | --- |
| **mg kg−1** | **S.E.** | **mg kg−1** | **S.E.** | **mg kg−1** | **S.E.** | **mg kg−1** | **S.E.** | **mg kg−1** | **S.E.** | **mg kg−1** | **S.E.** | **mg kg1** | **S.E.** | **mg kg−1** | **S.E.** |
| Freeman | 0 | 4.13E+05 | 4575 | 1.08E+04 | 904 | 2.22 | 0.10 | 17.46 | 1.11 | 1120 | 172 | 1045.40 | 103.19 | 1468.80 | 53.10 | 27.38 | 0.75 |
|  | KB/1 | 4.09E+05 | 3179 | 9.06E+03 | 371 | 2.72 | 0.18 | 26.84 | 3.86 | 629 | 219 | 1337.60 | 78.81 | 1789.80 | 64.04 | 30.48 | 2.16 |
|  | KB/2 | 4.21E+05 | 1844 | 1.02E+04 | 729 | 3.61 | 0.33 | 33.76 | 3.98 | 534 | 175 | 1338.00 | 71.80 | 1888.00 | 96.24 | 38.38 | 4.09 |
|  | KB/3 | 4.13E+05 | 2625 | 9.87E+03 | 497 | 2.65 | 0.58 | 45.40 | 12.48 | 313 | 7 | 818.20 | 188.28 | 1445.40 | 143.45 | 34.66 | 3.41 |
|  | KB/4 | 4.08E+05 | 4259 | 1.02E+04 | 724 | 1.52 | 0.21 | 32.98 | 2.58 | 288 | 21 | 711.40 | 91.73 | 1375.40 | 43.08 | 27.78 | 2.93 |
| Bernhill | 0 | N/A |  | N/A |  | 3.20 | 0.26 | 47.50 | 2.69 | 437 | 80 | 80 | 43.97 | 2037.20 | 91.42 | 69.84 | 3.53 |
|  | KB/1 | 4.17E+05 | 1465 | 1.28E+04 | 19 | 3.36 | 0.16 | 53.42 | 4.06 | 813 | 148 | 148 | 32.35 | 1946.20 | 131.11 | 77.02 | 5.10 |
|  | KB/2 | 4.21E+05 | 1361 | 1.13E+04 | 72 | 5.33 | 0.28 | 45.68 | 2.13 | 378 | 59 | 59 | 21.61 | 2132.75 | 47.24 | 82.98 | 1.90 |
|  | KB/3 | N/A |  | N/A |  | 4.57 | 1.82 | 44.17 | 15.64 | 342 | 50 | 50 | 212.60 | 2123.00 | 370.36 | 71.50 | 23.43 |
|  | KB/4 | 4.22E+05 | 2915 | 1.16E+04 | 950 | 3.24 | 0.17 | 49.68 | 2.10 | 249 | 13 | 13 | 69.44 | 2079.80 | 95.97 | 59.08 | 2.99 |
| Freeman | 0 | 4.33E+05 | 4855 | 1.36E+04 | 706 | 2.76 | 0.17 | 34.32 | 3.66 | 960 | 163 | 1034.60 | 72.38 | 1484.40 | 71.08 | 36.58 | 3.08 |
|  | W/1 | 4.22E+05 | 1430 | 1.02E+04 | 866 | 2.11 | 0.30 | 23.56 | 1.04 | 502 | 75 | 1151.00 | 111.50 | 1659.80 | 123.98 | 33.8 | 3.02 |
|  | W/2 | 4.24E+05 | 1840 | 8.30E+03 | 329 | 2.13 | 0.18 | 31.68 | 0.97 | 363 | 57 | 492.00 | 40.86 | 1123.00 | 52.20 | 32.5 | 3.45 |
|  | W/3 | 4.22E+05 | 1079 | 7.92E+03 | 213 | 1.27 | 0.06 | 23.80 | 1.61 | 355 | 44 | 404.00 | 75.01 | 981.40 | 44.91 | 29.16 | 7.26 |
|  | W/4 | 4.24E+05 | 3114 | 7.70E+03 | 475 | 0.37 | 0.05 | 21.26 | 1.36 | 239 | 55 | 903.60 | 44.70 | 710.00 | 40.68 | 12.7 | 1.07 |
| Bernhill | 0 | N/A |  | N/A |  | 2.99 | 0.19 | 56.00 | 4.16 | 359 | 62 | 481.20 | 19.83 | 1850.80 | 56.25 | 73.06 | 5.35 |
|  | W/1 | 4.31E+05 | 4230 | 1.07E+04 | 1767 | 4.94 | 0.38 | 52.12 | 2.65 | 186 | 21 | 560.20 | 24.45 | 1819.00 | 24.46 | 99.46 | 3.84 |
|  | W/2 | 4.30E+05 | 3180 | 1.02E+04 | 520 | 6.51 | 0.42 | 53.50 | 3.18 | 211 | 37 | 435.40 | 16.98 | 1822.20 | 29.65 | 125.50 | 6.27 |
|  | W/3 | 4.20E+05 | 2906 | 9.00E+03 | 296 | 2.09 | 0.24 | 35.28 | 4.65 | 261 | 12 | 578.20 | 53.09 | 1783.40 | 122.65 | 52.90 | 5.95 |
|  | W/4 | 4.26E+05 | 1651 | 1.19E+04 | 998 | 0.87 | 0.06 | 22.04 | 3.62 | 284 | 15 | 679.20 | 49.58 | 1406.00 | 142.22 | 38.12 | 5.97 |

**Table S2.** Elemental composition of the shoots from wheat (*Triticum aestivum* L.) grown in Freeman or Bernhill soils that were either not amended or were amended with increasing rates of biochars. Biochar was produced either from gasification of Kentucky bluegrass seed screenings (KB) or from the gasification of chipped tree top wood (W) from mixed conifers.

| **Soil Series** | **Amendment Type/Rate** | **Combustible C** | | **Combustible N** | | **Cd** | | **Cu** | | **Fe** | | **Mn** | | **S** | | **Zn** | |
| --- | --- | --- | --- | --- | --- | --- | --- | --- | --- | --- | --- | --- | --- | --- | --- | --- | --- |
| **mg kg−1** | **S.E.** | **mg kg−1** | **S.E.** | **mg kg−1** | **S.E.** | **mg kg−1** | **S.E.** | **mg kg−1** | **S.E.** | **mg kg−1** | **S.E.** | **mg kg1** | **S.E.** | **mg kg−1** | **S.E.** |
| Freeman | 0 | 4.02E+05 | 7941 | 9200 | 583 | 0.04 | 0.04 | 3.59 | 0.29 | 146.00 | 10.00 | 667.60 | 36.84 | 1393.00 | 51.33 | 12.90 | 3.21 |
|  | KB/1 | 3.96E+05 | 5049 | 8000 | 316 | 0.00 | 0.00 | 3.18 | 0.40 | 151.80 | 17.71 | 724.60 | 18.28 | 1318.80 | 92.97 | 12.78 | 0.75 |
|  | KB/2 | 4.00E+05 | 24000 | 7000 | 447 | 0.04 | 0.02 | 2.93 | 0.13 | 106.20 | 15.29 | 565.20 | 41.48 | 1194.60 | 90.31 | 14.94 | 1.25 |
|  | KB/3 | 3.97E+05 | 3000 | 8200 | 969 | 0.00 | 0.00 | 3.84 | 0.69 | 214.20 | 45.14 | 540.60 | 88.57 | 1442.60 | 52.37 | 20.58 | 1.37 |
|  | KB/4 | 3.83E+05 | 6800 | 7200 | 374 | 0.04 | 0.03 | 3.20 | 0.16 | 133.20 | 15.41 | 528.40 | 78.99 | 1006.80 | 61.64 | 20.80 | 2.85 |
| Bernhill | 0 | ND |  | ND |  | 0.47 | 0.19 | 4.71 | 0.83 | 88.25 | 7.32 | 243.50 | 14.59 | 1877.00 | 62.59 | 19.55 | 6.92 |
|  | KB/1 | ND |  | ND |  | 0.22 | 0.03 | 3.36 | 0.11 | 56.60 | 10.91 | 296.60 | 19.01 | 2320.60 | 84.04 | 14.50 | 1.03 |
|  | KB/2 | 3.77E+05 | 3610 | 7000 | 43 | 0.03 | 0.01 | 3.71 | 0.38 | 66.25 | 9.06 | 329.00 | 32.99 | 2239.25 | 227.38 | 32.85 | 4.41 |
|  | KB/3 | 3.91E+05 | 5790 | 7650 | 590 | 0.06 | 0.05 | 3.09 | 0.07 | 60.00 | 9.54 | 269.00 | 108.57 | 2735.67 | 692.84 | 27.53 | 2.11 |
|  | KB/4 | 3.77E+05 | 7480 | 8360 | 429 | 0.00 | 0.00 | 4.29 | 0.96 | 54.00 | 8.53 | 204.20 | 25.18 | 2246.20 | 73.42 | 20.04 | 1.08 |
| Freeman | 0 | 4.40E+05 | 21480 | 33562 | 24338 | 0.03 | 0.01 | 3.10 | 0.11 | 104.20 | 24.99 | 573.80 | 32.27 | 1404.40 | 76.90 | 11.64 | 1.02 |
|  | W/1 | 3.93E+05 | 3510 | 10183 | 427 | 0.06 | 0.03 | 3.37 | 0.12 | 208.80 | 27.75 | 642.40 | 42.60 | 1853.20 | 122.86 | 16.76 | 1.58 |
|  | W/2 | 3.91E+05 | 3140 | 7477 | 213 | 0.09 | 0.02 | 3.14 | 0.15 | 194.80 | 50.27 | 466.00 | 14.13 | 1079.60 | 44.53 | 21.14 | 1.41 |
|  | W/3 | 3.84E+05 | 4382 | 7063 | 382 | 0.01 | 0.01 | 2.66 | 0.08 | 99.60 | 10.58 | 406.40 | 23.87 | 933.80 | 50.03 | 24.32 | 2.55 |
|  | W/4 | 3.97E+05 | 2905 | 8036 | 532 | 0.00 | 0.00 | 2.27 | 0.12 | 105.80 | 22.99 | 462.40 | 22.03 | 904.40 | 67.33 | 15.50 | 2.47 |
| Bernhill | 0 | 3.98E+05 | 2168 | 12468 | 368 | 0.01 | 0.01 | 4.50 | 0.10 | 112.20 | 32.65 | 268.20 | 13.22 | 2704.80 | 171.11 | 20.50 | 1.36 |
|  | W/1 | 3.75E+05 | 2339 | 10191 | 374 | 0.07 | 0.01 | 2.90 | 0.10 | 69.20 | 8.67 | 350.20 | 34.03 | 2922.60 | 204.36 | 21.18 | 0.46 |
|  | W/2 | 3.77E+05 | 3411 | 10584 | 578 | 0.17 | 0.02 | 3.34 | 0.08 | 68.40 | 4.60 | 345.60 | 17.85 | 3188.60 | 255.27 | 33.62 | 3.98 |
|  | W/3 | 3.89E+05 | 3886 | 10560 | 1320 | 0.10 | 0.04 | 4.03 | 0.65 | 99.40 | 31.81 | 458.00 | 56.54 | 2354.40 | 235.80 | 34.70 | 6.88 |
|  | W/4 | 4.01E+05 | 4674 | 10684 | 1046 | 0.07 | 0.04 | 2.79 | 0.18 | 87.60 | 16.71 | 454.40 | 32.37 | 1827.80 | 141.67 | 24.12 | 4.85 |

**Table S3.** Digested soil elemental analysis after growth of wheat for 74 d after planting in a greenhouse and grown in a mixture of Freeman or Bernhill soil (Spokane County, Washington) amended with biochar produced from gasification of Kentucky bluegrass seed screenings. These results are total element values obtained from analysis following nitric acid digestion of the soil.

| **Soil Series** | **Amendment Type/Rate** | **Cd** | | **Cu** | | **Fe** | | **Mn** | | **S** | | **Zn** | |
| --- | --- | --- | --- | --- | --- | --- | --- | --- | --- | --- | --- | --- | --- |
| **mg kg−1** | **S.E.** | **mg kg−1** | **S.E.** | **mg kg−1** | **S.E.** | **mg kg−1** | **S.E.** | **mg kg1** | **S.E.** | **mg kg−1** | **S.E.** |
| Freeman | 0 | 1.34 | 0.12 | 19.98 | 0.61 | 21,972 | 355 | 732 | 14.57 | 157.00 | 5.46 | 56.20 | 0.91 |
|  | KB/1 | 1.29 | 0.08 | 19.56 | 0.15 | 21,834 | 361 | 807 | 80.24 | 180.80 | 26.02 | 60.24 | 3.39 |
|  | KB/2 | 1.23 | 0.03 | 19.79 | 0.19 | 22,210 | 206 | 746 | 17.50 | 166.20 | 1.98 | 56.96 | 0.62 |
|  | KB/3 | 1.14 | 0.05 | 19.42 | 0.23 | 21,568 | 183 | 809 | 65.68 | 173.00 | 4.30 | 55.86 | 0.15 |
|  | KB/4 | 1.12 | 0.03 | 19.50 | 0.17 | 21,346 | 210 | 788 | 49.10 | 209.80 | 11.06 | 56.60 | 0.43 |
| Bernhill | 0 | 1.43 | 0.07 | 19.12 | 0.27 | 20,540 | 113 | 613 | 4.93 | 260.40 | 2.29 | 68.48 | 0.42 |
|  | KB/1 | 1.24 | 0.02 | 18.62 | 0.25 | 20,498 | 427 | 663 | 32.29 | 247.20 | 21.59 | 64.90 | 2.41 |
|  | KB/2 | 1.33 | 0.08 | 18.84 | 0.17 | 20,022 | 96 | 608 | 10.71 | 283.60 | 3.04 | 68.08 | 0.49 |
|  | KB/3 | 1.37 | 0.04 | 19.33 | 0.13 | 20,272 | 100 | 621 | 10.81 | 303.60 | 4.20 | 69.72 | 0.37 |
|  | KB/4 | 1.27 | 0.03 | 18.94 | 0.30 | 19,382 | 187 | 619 | 14.45 | 288.40 | 8.33 | 68.54 | 0.95 |
| Freeman | 0 | 1.19 | 0.11 | 19.05 | 0.59 | 21,158 | 467 | 733 | 33.68 | 143.60 | 2.77 | 54.34 | 1.00 |
|  | W/1 | 1.46 | 0.02 | 20.64 | 0.56 | 21,970 | 290 | 732 | 32.07 | 137.40 | 1.33 | 55.96 | 0.65 |
|  | W/2 | 1.42 | 0.02 | 20.27 | 0.34 | 21,794 | 297 | 785 | 25.20 | 139.80 | 1.93 | 58.14 | 0.79 |
|  | W/3 | 1.55 | 0.05 | 21.12 | 0.29 | 22,190 | 247 | 813 | 40.93 | 139.20 | 3.69 | 61.94 | 1.00 |
|  | W/4 | 1.44 | 0.01 | 20.63 | 0.18 | 21,480 | 216 | 789 | 18.91 | 156.00 | 17.78 | 66.36 | 0.75 |
| Bernhill | 0 | 1.64 | 0.06 | 19.87 | 0.35 | 20,682 | 266 | 611 | 9.07 | 224.40 | 2.11 | 68.28 | 0.91 |
|  | W/1 | 1.54 | 0.02 | 19.18 | 0.13 | 20,380 | 203 | 610 | 4.09 | 228.20 | 1.66 | 67.52 | 0.43 |
|  | W/2 | 1.51 | 0.02 | 19.39 | 0.17 | 20,172 | 162 | 611 | 8.62 | 228.00 | 1.14 | 69.02 | 0.43 |
|  | W/3 | 1.62 | 0.06 | 19.86 | 0.24 | 20,274 | 83 | 660 | 4.50 | 244.00 | 6.88 | 74.34 | 0.34 |
|  | W/4 | 1.57 | 0.02 | 20.12 | 0.19 | 19,988 | 82 | 701 | 9.41 | 323.40 | 21.98 | 82.94 | 1.97 |
